# Supplementary material for: Enrichment, Bioaccumulation and Health Risks of Trace Metals in Soils and Leafy Vegetables Grown on the Banks of the Ugandan Lifeline River, River Rwizi
Source: MDPI journal article supplement (doi:10.3390/world5010008), 2024-03-15
Supplement: s1 [file s1]

*Article*

# **Enrichment, bioaccumulation and health risks of trace metals in soils and leafy vegetables grown on the banks of the Ugandan lifeline river, River Rwizi**

**Deus R. Rutehenda <sup>1</sup>, Christopher Adaku <sup>1</sup>, Timothy Omara <sup>2\*</sup>, Christopher Angiro<sup>3</sup>, and Emmanuel Ntambi <sup>1</sup>**

<sup>1</sup> Department of Chemistry, Faculty of Science, Mbarara University of Science and Technology, Mbarara, Uganda.

<sup>2</sup> Department of Chemistry, College of Natural Sciences, Makerere University, Kampala, Uganda.

<sup>3</sup> Centre for Water, Environment and Development-School of Water, Energy and Environment, Cranfield University, Cranfield Road, Cranfield, Bedfordshire MK43 0AL, UK.

\* Correspondence: [prof.timo2018@gmail.com](mailto:prof.timo2018@gmail.com)

## **SUPPLEMENTARY MATERIALS**

**Table S1:** Values of exposure factors used in health risk assessments due to TMTs in soils from banks of River Rwizi, Mbarara City, Uganda

| Factor    | Description (units)                                                 | Factor values                                                                                                            |                     |
|-----------|---------------------------------------------------------------------|--------------------------------------------------------------------------------------------------------------------------|---------------------|
|           |                                                                     | Children                                                                                                                 | Adults              |
| $C_{TMT}$ | Concentration of the TMT in the soils (mg kg <sup>-1</sup> )        | This study                                                                                                               | This study          |
| $IngRS$   | Ingestion rate (mg day <sup>-1</sup> )                              | 200                                                                                                                      | 100                 |
| $IngRV$   | Fresh food ingestion rate(kg/person/day)                            | 0.085                                                                                                                    | 0.085               |
| EXF       | Exposure frequency (days year <sup>-1</sup> )                       | 350                                                                                                                      | 350                 |
| EXD       | Exposure duration (years)                                           | 6                                                                                                                        | 30                  |
| FI        | Fraction ingested from the contaminated source (unitless)           | 1.0                                                                                                                      | 1.0                 |
| $InhRS$   | Inhalation rate of soil as dust (m <sup>3</sup> day <sup>-1</sup> ) | 200                                                                                                                      | 100                 |
| CVF       | Conversion factor (kg mg <sup>-1</sup> )                            | $1 \times 10^{-6}$                                                                                                       | $1 \times 10^{-6}$  |
| $W_{ab}$  | Body weight (kg)                                                    | 15                                                                                                                       | 60                  |
| $T_{aet}$ | Average time (days)                                                 | Non-carcinogenic: EXD $\times$ 365 days year <sup>-1</sup> ; carcinogenic: 60 years $\times$ 365 days year <sup>-1</sup> |                     |
| $S_{AF}$  | Surface area of skin exposed to soil as dust (cm <sup>2</sup> )     | 2800                                                                                                                     | 5700                |
| PEF       | Particular emission rate (m <sup>3</sup> kg <sup>-1</sup> )         | $1.316 \times 10^9$                                                                                                      | $1.316 \times 10^9$ |
| AF        | Skin adherence factor (mg cm <sup>-2</sup> )                        | 0.2                                                                                                                      | 0.7                 |
| DAF       | Dermal absorption factor (unitless)                                 | 0.001                                                                                                                    | 0.001               |

Based on US EPA [1, 2], Ferreira-Baptista and De Miguel [3], Ajeh et al. [4] and Adedokun et al. [5].

**Table S2:** Classification values of pollution and risk indices used in study of TMTs in soils from banks of River Rwizi, Mbarara City, Uganda

| Pollution and risk indicators            | Classification values                               | Description                      |
|------------------------------------------|-----------------------------------------------------|----------------------------------|
| Contamination factor (CFs) [6]           | CF < 1                                              | Low contamination                |
|                                          | $1 \leq CF < 3$                                     | Moderate contamination           |
|                                          | $3 \leq CF < 6$                                     | Considerable contamination       |
|                                          | CF > 6                                              | Very high contamination          |
| Geo-accumulation index ( $I_{geo}$ ) [7] | $I_{geo} < 0$ (class 0)                             | Practically uncontaminated       |
|                                          | $0 < I_{geo} < 1$ (class 1)                         | Low to median contamination      |
|                                          | $1 < I_{geo} < 2$ (class 2)                         | Median contamination             |
|                                          | $2 < I_{geo} < 3$ (class 3)                         | Median to strong contamination   |
|                                          | $3 < I_{geo} < 4$ (class 4)                         | Serious contamination            |
|                                          | $4 < I_{geo} < 5$ (class 5)                         | Serious to extreme contamination |
| Pollution Load index (PLDI)              | $I_{geo} > 5$ (class 6)                             | Extreme contamination            |
|                                          | PLDI < 1                                            | Unpolluted                       |
| Ecological risk ( $E_R^i$ and PERI) [6]  | PLDI > 1                                            | Polluted                         |
|                                          | $E_R^i < 40$ ; PERI < 95                            | Low contamination                |
|                                          | $40 \leq E_R^i \leq 80$ ; $95 \leq PERI \leq 190$   | Moderate contamination           |
|                                          | $80 \leq E_R^i \leq 160$ ; $190 \leq PERI \leq 380$ | Considerable contamination       |
|                                          | $160 \leq E_R^i \leq 320$ ; PERI $\geq 380$         | High contamination               |
|                                          | $320 \leq E_R^i$                                    | Very high contamination          |

**Table S4:** Estimated daily intake, hazard quotients, and indices for intake of manganese in leafy vegetables from the banks of River Rwizi, Mbarara City, Uganda.

| Age Group | Sampling Site | Estimated daily intake of manganese (mg kg <sup>-1</sup> day <sup>-1</sup> ) |                |                    |                  |                    | Hazard Quotient    |                |                    |                  |                    | Hazard Index      |
|-----------|---------------|------------------------------------------------------------------------------|----------------|--------------------|------------------|--------------------|--------------------|----------------|--------------------|------------------|--------------------|-------------------|
|           |               | <i>B. oleracea</i>                                                           | <i>C. pepo</i> | <i>S. oleracea</i> | <i>S. nigrum</i> | <i>A. hybridus</i> | <i>B. oleracea</i> | <i>C. pepo</i> | <i>S. oleracea</i> | <i>S. nigrum</i> | <i>A. hybridus</i> |                   |
| Children  | A             | 1.808093607                                                                  | 0.66713356     | 1.780245434        | 0.493523973      | 0.599075342        | 12.91495434        | 4.76524        | 12.71603881        | 3.525171         | 4.27911            | <b>38.2005137</b> |
|           | B             | 1.715039954                                                                  | 1.3815411      | 0.991666667        | 1.252488584      | 2.173515982        | 12.25028539        | 9.868151       | 7.083333333        | 8.946347         | 15.52511           | <b>53.6732306</b> |
|           | C             | 0.604237443                                                                  | 0.42003196     | 0.667269406        | 0.66794863       | 0.577883562        | 4.315981735        | 3.000228       | 4.766210046        | 4.771062         | 4.12774            | <b>20.9812215</b> |
|           | D             | 0.880273973                                                                  | 0.35401142     | 1.278978311        | 0.435246575      | 1.660702055        | 6.287671233        | 2.528653       | 9.135559361        | 3.108904         | 11.86216           | <b>32.9229452</b> |
|           | E             | 0.88163242                                                                   | 0.34015525     | 0.95227169         | 0.349528539      | 1.034457763        | 6.297374429        | 2.42968        | 6.801940639        | 2.496632         | 7.388984           | <b>25.4146119</b> |
| Adults    | A             | 0.09040468                                                                   | 0.03335668     | 0.089012272        | 0.024676199      | 0.029953767        | 0.645747717        | 0.238262       | 0.63580194         | 0.176259         | 0.213955           | <b>1.91002568</b> |
|           | B             | 0.085751998                                                                  | 0.06907705     | 0.089012272        | 0.024676199      | 0.029953767        | 0.612514269        | 0.493408       | 0.63580194         | 0.176259         | 0.213955           | <b>2.13193778</b> |
|           | C             | 0.030211872                                                                  | 0.0210016      | 0.049583333        | 0.062624429      | 0.108675799        | 0.215799087        | 0.150011       | 0.354166667        | 0.447317         | 0.776256           | <b>1.94355023</b> |
|           | D             | 0.044013699                                                                  | 0.01770057     | 0.03336347         | 0.033397431      | 0.028894178        | 0.314383562        | 0.126433       | 0.238310502        | 0.238553         | 0.206387           | <b>1.12406678</b> |
|           | E             | 0.044081621                                                                  | 0.01700776     | 0.063948915        | 0.021762329      | 0.083035103        | 0.314868721        | 0.121484       | 0.456777968        | 0.155445         | 0.593108           | <b>1.64168379</b> |

Note: Kashanyarazi area (A), Behind Mbarara Regional Hospital (B), Katete area (C), Rugazi Bridge area (D) and Below Bishop Stuart University (E). Values in **bold** exceeded 1, indicating the possibility of non-cancer health effects being experienced by the exposed group.

**Table S5:** Estimated daily intake, hazard quotients, and indices for intake of zinc in leafy vegetables from the banks of River Rwizi, Mbarara City, Uganda.

| Age Group | Sampling Site | Estimated daily intake of zinc (mg kg <sup>-1</sup> day <sup>-1</sup> ) |                |                    |                  |                    | Hazard Quotient    |                |                    |                  |                    | Hazard Index       |
|-----------|---------------|-------------------------------------------------------------------------|----------------|--------------------|------------------|--------------------|--------------------|----------------|--------------------|------------------|--------------------|--------------------|
|           |               | <i>B. oleracea</i>                                                      | <i>C. pepo</i> | <i>S. oleracea</i> | <i>S. nigrum</i> | <i>A. hybridus</i> | <i>B. oleracea</i> | <i>C. pepo</i> | <i>S. oleracea</i> | <i>S. nigrum</i> | <i>A. hybridus</i> |                    |
| Children  | A             | 0.95227169                                                              | 0.81371005     | 1.713002283        | 0.724052511      | 0.63276484         | 3.174238965        | 2.71236681     | 5.71000761         | 2.413508         | 2.109216           | <b>16.1193379</b>  |
|           | B             | 0.918989726                                                             | 0.91695205     | 0.682619863        | 0.751900685      | 1.106455479        | 3.063299087        | 3.05650684     | 2.275399543        | 2.506336         | 3.688185           | <b>14.58972603</b> |
|           | C             | 0.345453196                                                             | 0.68126142     | 0.547861872        | 0.591332192      | 0.73288242         | 1.151510655        | 2.27087138     | 1.826206241        | 1.971107         | 2.442941           | <b>9.662636986</b> |
|           | D             | 0.407941781                                                             | 0.67542009     | 0.823219178        | 0.531560502      | 0.816426941        | 1.359805936        | 2.25140030     | 2.744063927        | 1.771868         | 2.721423           | <b>10.84856164</b> |
|           | E             | 0.426552511                                                             | 0.57190639     | 0.823219178        | 0.414598174      | 0.552480594        | 1.421841705        | 1.90635464     | 2.744063927        | 1.381994         | 1.841602           | <b>9.295856164</b> |
| Adults    | A             | 0.047613584                                                             | 0.0406855      | 0.085650114        | 0.036202626      | 0.031638242        | 0.158711948        | 0.13561834     | 0.28550038         | 0.120675         | 0.105461           | 0.805966895        |
|           | B             | 0.045949486                                                             | 0.0458476      | 0.034130993        | 0.037595034      | 0.055322774        | 0.153164954        | 0.15282534     | 0.113769977        | 0.125317         | 0.184409           | 0.729486301        |
|           | C             | 0.01727266                                                              | 0.03406307     | 0.027393094        | 0.02956661       | 0.036644121        | 0.057575533        | 0.11354356     | 0.091310312        | 0.098555         | 0.122147           | 0.483131849        |
|           | D             | 0.020397089                                                             | 0.033771       | 0.041160959        | 0.026578025      | 0.040821347        | 0.067990297        | 0.11257001     | 0.137203196        | 0.088593         | 0.136071           | 0.542428082        |
|           | E             | 0.021327626                                                             | 0.02859532     | 0.041160959        | 0.020729909      | 0.02762403         | 0.071092085        | 0.09531773     | 0.137203196        | 0.0691           | 0.09208            | 0.464792808        |

Note: Kashanyarazi Area (A), Behind Mbarara Regional Hospital (B), Katete area (C), Rugazi Bridge area (D) and Below Bishop Stuart University (E). Values in **bold** exceeded 1, indicating the possibility of non-cancer health effects being experienced by the exposed group.

**Table S6:** Estimated daily intake through ingestion, hazard quotients, and indices for intake of cadmium in leafy vegetables from the banks of River Rwizi, Mbarara City, Uganda.

| Age Group | Sampling Site | Estimated daily intake of cadmium (mg kg <sup>-1</sup> day <sup>-1</sup> ) |                |                    |                  |                    | Hazard Quotient    |                |                    |                  |                    | Hazard Index       |
|-----------|---------------|----------------------------------------------------------------------------|----------------|--------------------|------------------|--------------------|--------------------|----------------|--------------------|------------------|--------------------|--------------------|
|           |               | <i>B. oleracea</i>                                                         | <i>C. pepo</i> | <i>S. oleracea</i> | <i>S. nigrum</i> | <i>A. hybridus</i> | <i>B. oleracea</i> | <i>C. pepo</i> | <i>S. oleracea</i> | <i>S. nigrum</i> | <i>A. hybridus</i> |                    |
| Children  | A             | 0.027712329                                                                | 0.02377283     | 0.02716895         | 0.024452055      | 0.021055936        | 27.71232877        | 23.77283105    | 27.16894977        | 24.45205         | 21.05594           | <b>124.1621005</b> |
|           | B             | 0.026489726                                                                | 0.01222603     | 0.013584475        | 0.020512557      | 0.040753425        | 26.48972603        | 12.2260274     | 13.58447489        | 20.51256         | 40.75342           | <b>113.56621</b>   |
|           | C             | 0.019018265                                                                | 0.01630137     | 0.015622146        | 0.012905251      | 0.015622146        | 19.01826484        | 16.30136986    | 15.62214612        | 12.90525         | 15.62215           | <b>79.46917808</b> |
|           | D             | 0.019697489                                                                | 0.01358447     | 0.017659817        | 0.011682648      | 0.012905251        | 19.69748858        | 13.58447489    | 17.65981735        | 11.68265         | 12.90525           | <b>75.52968037</b> |
|           | E             | 0.019833333                                                                | 0.01100342     | 0.01915411         | 0.01086758       | 0.012226027        | 19.83333333        | 11.00342466    | 19.15410959        | 10.86758         | 12.22603           | <b>73.08447489</b> |
| Adults    | A             | 0.001385616                                                                | 0.00118864     | 0.001358447        | 0.001222603      | 0.001052797        | 1.385616438        | 1.188641552    | 1.358447488        | 1.222603         | 1.052797           | <b>6.20810502</b>  |
|           | B             | 0.001324486                                                                | 0.0006113      | 0.000679224        | 0.001025628      | 0.002037671        | 1.324486301        | 0.61130137     | 0.679223744        | 1.025628         | 2.037671           | <b>5.6783105</b>   |
|           | C             | 0.000950913                                                                | 0.00081507     | 0.000781107        | 0.000645263      | 0.000781107        | 0.950913242        | 0.815068493    | 0.781107306        | 0.645263         | 0.781107           | <b>3.973458902</b> |
|           | D             | 0.000984874                                                                | 0.00067922     | 0.000882991        | 0.000584132      | 0.000645263        | 0.984874429        | 0.679223744    | 0.882990867        | 0.584132         | 0.645263           | <b>3.776484017</b> |
|           | E             | 0.000991667                                                                | 0.00055017     | 0.000957705        | 0.000543379      | 0.000611301        | 0.991666666        | 0.550171233    | 0.957705479        | 0.543379         | 0.611301           | <b>3.654223743</b> |

Note: Kashanyarazi Area (A), Behind Mbarara Regional Hospital (B), Katete area (C), Rugazi Bridge area (D) and Below Bishop Stuart University (E). Values in **bold** exceeded 1, indicating the possibility of non-cancer health effects being experienced by the exposed group.

**Table S7:** Estimated daily intake, hazard quotients, and indices for intake of lead in leafy vegetables from the banks of River Rwizi, Mbarara City, Uganda.

| Age Group | Sampling Site | Estimated daily intake of lead (mg kg <sup>-1</sup> day <sup>-1</sup> ) |                |                    |                  |                    | Hazard Quotient    |                |                    |                  |                    | Hazard Index       |
|-----------|---------------|-------------------------------------------------------------------------|----------------|--------------------|------------------|--------------------|--------------------|----------------|--------------------|------------------|--------------------|--------------------|
|           |               | <i>B. oleracea</i>                                                      | <i>C. pepo</i> | <i>S. oleracea</i> | <i>S. nigrum</i> | <i>A. hybridus</i> | <i>B. oleracea</i> | <i>C. pepo</i> | <i>S. oleracea</i> | <i>S. nigrum</i> | <i>A. hybridus</i> |                    |
| Children  | A             | 0.006276027                                                             | 0.006248858    | 0.006724315        | 0.009210274      | 0.007118265        | 1.793150685        | 1.785388128    | 1.921232877        | 2.631507         | 2.03379            | <b>10.16506849</b> |
|           | B             | 0.006045091                                                             | 0.00737637     | 0.006113014        | 0.00658847       | 0.007878995        | 1.72716895         | 2.107534247    | 1.746575342        | 1.88242          | 2.251142           | <b>9.714840183</b> |
|           | C             | 0.009726484                                                             | 0.00904726     | 0.006724315        | 0.006928082      | 0.009386872        | 2.778995434        | 2.584931507    | 1.921232877        | 1.979452         | 2.681963           | <b>11.94657534</b> |
|           | D             | 0.01022911                                                              | 0.009101598    | 0.007539384        | 0.004292694      | 0.010025342        | 2.92260274         | 2.600456621    | 2.154109589        | 1.226484         | 2.864384           | <b>11.76803653</b> |
|           | E             | 0.010364954                                                             | 0.007063927    | 0.00777032         | 0.001290525      | 0.002798402        | 2.961415525        | 2.01826484     | 2.220091324        | 0.368721         | 0.799543           | <b>8.36803653</b>  |
| Adults    | A             | 0.000313801                                                             | 0.000312443    | 0.000336216        | 0.000460514      | 0.000355913        | 0.089657534        | 0.089269406    | 0.096061644        | 0.131575         | 0.101689           | 0.508253424        |
|           | B             | 0.000302255                                                             | 0.000368818    | 0.000305651        | 0.000329424      | 0.00039395         | 0.086358447        | 0.105376712    | 0.087328767        | 0.094121         | 0.112557           | 0.485742009        |
|           | C             | 0.000486324                                                             | 0.000452363    | 0.000336216        | 0.000346404      | 0.000469344        | 0.138949772        | 0.129246575    | 0.096061644        | 0.098973         | 0.134098           | 0.597328767        |
|           | D             | 0.000511455                                                             | 0.00045508     | 0.000376969        | 0.000214635      | 0.000501267        | 0.146130137        | 0.130022831    | 0.107705479        | 0.061324         | 0.143219           | 0.588401826        |
|           | E             | 0.000518248                                                             | 0.000353196    | 0.000388516        | 0.00006453       | 0.00013992         | 0.148070776        | 0.100913242    | 0.111004566        | 0.018436         | 0.039977           | 0.418401826        |

Note: Kashanyarazi Area (A), Behind Mbarara Regional Hospital (B), Katete area (C), Rugazi Bridge area (D) and Below Bishop Stuart University (E). Values in **bold** exceeded 1, indicating the possibility of non-cancer health effects being experienced by the exposed group.

**Table S8:** Estimated daily intake, hazard quotients, and indices for intake of chromium in leafy vegetables from the banks of River Rwizi, Mbarara City, Uganda.

| Age Group | Sampling Site | Estimated daily intake of chromium (mg kg <sup>-1</sup> day <sup>-1</sup> ) |                |                    |                  |                    | Hazard Quotient    |                |                    |                  |                    | Hazard Index    |
|-----------|---------------|-----------------------------------------------------------------------------|----------------|--------------------|------------------|--------------------|--------------------|----------------|--------------------|------------------|--------------------|-----------------|
|           |               | <i>B. oleracea</i>                                                          | <i>C. pepo</i> | <i>S. oleracea</i> | <i>S. nigrum</i> | <i>A. hybridus</i> | <i>B. oleracea</i> | <i>C. pepo</i> | <i>S. oleracea</i> | <i>S. nigrum</i> | <i>A. hybridus</i> |                 |
| Children  | A             | 0.001005251                                                                 | 0.000882991    | 0.00081507         | 0.00081507       | 0.00088299         | 0.335084           | 0.294330289    | 0.271689498        | 0.271689498      | 0.294330289        | <b>1.467123</b> |
|           | B             | 0.000882991                                                                 | 0.001018836    | 0.00108676         | 0.00095091       | 0.00081507         | 0.294330           | 0.339611872    | 0.362252664        | 0.316971081      | 0.271689498        | <b>1.584855</b> |
|           | C             | 0.001086758                                                                 | 0.001086758    | 0.00108676         | 0.00115468       | 0.00108676         | 0.362253           | 0.362252664    | 0.362252664        | 0.384893455      | 0.362252664        | <b>1.833904</b> |
|           | D             | 0.001018836                                                                 | 0.000978082    | 0.00095091         | 0.00101884       | 0.00108676         | 0.339612           | 0.326027397    | 0.316971081        | 0.339611872      | 0.362252664        | <b>1.684475</b> |
|           | E             | 0.001018836                                                                 | 0.000706393    | 0.00096450         | 0.00081507       | 0.00115468         | 0.339612           | 0.235464231    | 0.321499239        | 0.271689498      | 0.384893455        | <b>1.553158</b> |
| Adults    | A             | 0.0000503                                                                   | 0.0000503      | 0.00004075         | 0.00004075       | 0.00004415         | 0.016754           | 0.016754186    | 0.013584475        | 0.013584475      | 0.014716514        | 0.075394        |
|           | B             | 0.0000441                                                                   | 0.0000441      | 0.00005434         | 0.00004755       | 0.00004075         | 0.014717           | 0.014716514    | 0.018112633        | 0.015848554      | 0.013584475        | 0.076979        |
|           | C             | 0.0000543                                                                   | 0.0000543      | 0.00005434         | 0.00005773       | 0.00005434         | 0.018113           | 0.018112633    | 0.018112633        | 0.019244673      | 0.018112633        | 0.091695        |
|           | D             | 0.0000509                                                                   | 0.0000509      | 0.00004755         | 0.00005094       | 0.00005434         | 0.016981           | 0.016980594    | 0.015848554        | 0.016980594      | 0.018112633        | 0.084903        |
|           | E             | 0.0000509                                                                   | 0.0000509      | 0.00004822         | 0.00004075       | 0.00005773         | 0.016981           | 0.016980594    | 0.016074962        | 0.013584475      | 0.019244673        | 0.082865        |

Note: Kashanyarazi Area (A), Behind Mbarara Regional Hospital (B), Katete area (C), Rugazi Bridge area (D) and Below Bishop Stuart University (E). Values in **bold** exceeded 1, indicating the possibility of non-cancer health effects being experienced by the exposed group.

**Table S9:** Estimated daily intake, hazard quotients, and indices for intake of copper in leafy vegetables from the banks of River Rwizi, Mbarara City, Uganda.

| Age Group | Sampling Site | Estimated daily intake of copper (mg kg <sup>-1</sup> day <sup>-1</sup> ) |                |                    |                  |                    | Hazard Quotient    |                |                    |                  |                    | Hazard Index |
|-----------|---------------|---------------------------------------------------------------------------|----------------|--------------------|------------------|--------------------|--------------------|----------------|--------------------|------------------|--------------------|--------------|
|           |               | <i>B. oleracea</i>                                                        | <i>C. pepo</i> | <i>S. oleracea</i> | <i>S. nigrum</i> | <i>A. hybridus</i> | <i>B. oleracea</i> | <i>C. pepo</i> | <i>S. oleracea</i> | <i>S. nigrum</i> | <i>A. hybridus</i> |              |
| Children  | A             | 0.111800228                                                               | 0.170077626    | 0.109762557        | 0.511455479      | 0.071454338        | 0.074533486        | 0.113385084    | 0.073175038        | 0.34097032       | 0.047636225        | 0.649700152  |
|           | B             | 0.102019406                                                               | 0.082186073    | 0.078110731        | 0.161519406      | 0.114652968        | 0.068012938        | 0.054790715    | 0.05207382         | 0.107679604      | 0.076435312        | 0.35899239   |
|           | C             | 0.029885845                                                               | 0.146984018    | 0.12701484         | 0.111256849      | 0.089929224        | 0.019923896        | 0.097989346    | 0.08467656         | 0.074171233      | 0.059952816        | 0.336713851  |
|           | D             | 0.04319863                                                                | 0.125113014    | 0.094276256        | 0.062488584      | 0.098759132        | 0.028799087        | 0.083408676    | 0.062850837        | 0.041659056      | 0.065839422        | 0.282557078  |
|           | E             | 0.054881279                                                               | 0.11098516     | 0.093732877        | 0.041704338      | 0.085853881        | 0.036587519        | 0.073990107    | 0.062488584        | 0.027802892      | 0.057235921        | 0.258105023  |
| Adults    | A             | 0.005590011                                                               | 0.008503881    | 0.005488128        | 0.025572774      | 0.003572717        | 0.003726674        | 0.005669254    | 0.003658752        | 0.017048516      | 0.002381811        | 0.032485008  |
|           | B             | 0.00510097                                                                | 0.004109304    | 0.003905537        | 0.00807597       | 0.005732648        | 0.003400647        | 0.002739536    | 0.002603691        | 0.00538398       | 0.003821766        | 0.017949619  |
|           | C             | 0.001494292                                                               | 0.007349201    | 0.006350742        | 0.005562842      | 0.004496461        | 0.000996195        | 0.004899467    | 0.004233828        | 0.003708562      | 0.002997641        | 0.016835693  |
|           | D             | 0.002159932                                                               | 0.006255651    | 0.004713813        | 0.003124429      | 0.004937957        | 0.001439954        | 0.004170434    | 0.003142542        | 0.002082953      | 0.003291971        | 0.014127854  |
|           | E             | 0.002744064                                                               | 0.005549258    | 0.004686644        | 0.002085217      | 0.004292694        | 0.001829376        | 0.003699505    | 0.003124429        | 0.001390145      | 0.002861796        | 0.012905251  |

**Note:** Kashanyarazi Area (A), Behind Mbarara Regional Hospital (B), Katete area (C), Rugazi Bridge area (D) and Below Bishop Stuart University (E).

**Table S10:** Carcinogenic risk values for ingestion of cadmium and lead in soils sampled along the stretch of Rwizi River, Mbarara City, Uganda.

| Ingested matrix | Age Group | Sampling Site | Cancer risk ( $\times 10^{-6}$ ) |        | Total cancer risk ( $\times 10^{-6}$ ) |
|-----------------|-----------|---------------|----------------------------------|--------|----------------------------------------|
|                 |           |               | Cd                               | Pb     |                                        |
| Soils           | Children  | A             | 1.9038                           | 1.1302 | 3.0340                                 |
|                 |           | B             | 1.8036                           | 1.3204 | 3.1240                                 |
|                 |           | C             | 1.8036                           | 1.8257 | 3.6293                                 |
|                 |           | D             | 1.6533                           | 0.6434 | 2.2967                                 |
|                 |           | E             | 1.8036                           | 0.3760 | 2.1796                                 |
|                 | Adults    | A             | 0.2505                           | 0.0015 | 0.2519                                 |
|                 |           | B             | 0.2004                           | 0.0016 | 0.2020                                 |
|                 |           | C             | 0.2004                           | 0.0023 | 0.2027                                 |
|                 |           | D             | 0.2004                           | 0.0008 | 0.2012                                 |
|                 |           | E             | 0.2004                           | 0.0005 | 0.2009                                 |

**Note:** Kashanyarazi Area (A), Behind Mbarara Regional Hospital (B), Katete area (C), Rugazi Bridge area (D) and Below Bishop Stuart University (E).

**Table S11:** Carcinogenic risk values of cadmium and lead from consumption of leafy vegetables grown along the stretch of Rwizi River, Mbarara City, Uganda

| Trace metal | Age Group | Sampling Site | Cancer risk values |                |                    |                  |                    |
|-------------|-----------|---------------|--------------------|----------------|--------------------|------------------|--------------------|
|             |           |               | <i>B. oleracea</i> | <i>C. pepo</i> | <i>S. oleracea</i> | <i>S. nigrum</i> | <i>A. hybridus</i> |
| Cadmium     | Children  | A             | 1.39E-02           | 1.19E-02       | 1.36E-02           | 1.23E-02         | 1.05E-02           |
|             |           | B             | 1.33E-02           | 6.13E-03       | 6.81E-03           | 1.03E-02         | 2.04E-02           |
|             |           | C             | 9.53E-03           | 8.17E-03       | 7.83E-03           | 6.47E-03         | 7.83E-03           |
|             |           | D             | 9.87E-03           | 6.81E-03       | 8.85E-03           | 5.85E-03         | 6.47E-03           |
|             |           | E             | 9.94E-03           | 5.51E-03       | 9.60E-03           | 5.44E-03         | 6.13E-03           |
|             | Adults    | A             | 6.94E-04           | 5.96E-04       | 6.81E-04           | 6.13E-04         | 5.27E-04           |
|             |           | B             | 6.64E-04           | 3.06E-04       | 3.40E-04           | 5.14E-04         | 1.02E-03           |
|             |           | C             | 4.76E-04           | 4.08E-04       | 3.91E-04           | 3.23E-04         | 3.91E-04           |
|             |           | D             | 4.93E-04           | 3.40E-04       | 4.42E-04           | 2.93E-04         | 3.23E-04           |
|             |           | E             | 4.97E-04           | 2.76E-04       | 4.80E-04           | 2.72E-04         | 3.06E-04           |
| Lead        | Children  | A             | 5.33462E-06        | 5.31153E-06    | 5.71567E-06        | 7.82873E-06      | 6.05053E-06        |
|             |           | B             | 5.13833E-06        | 6.26991E-06    | 5.19606E-06        | 5.6002E-06       | 6.69715E-06        |
|             |           | C             | 8.26751E-06        | 7.69017E-06    | 5.71567E-06        | 5.88887E-06      | 7.97884E-06        |
|             |           | D             | 8.69474E-06        | 7.73636E-06    | 6.40848E-06        | 3.64879E-06      | 8.52154E-06        |
|             |           | E             | 8.81021E-06        | 6.00434E-06    | 6.60477E-06        | 1.09695E-06      | 2.37864E-06        |
|             | Adults    | A             | 2.66731E-07        | 2.65577E-07    | 2.85784E-07        | 3.91437E-07      | 3.02526E-07        |
|             |           | B             | 2.56917E-07        | 3.13495E-07    | 2.59803E-07        | 2.8001E-07       | 3.34858E-07        |
|             |           | C             | 4.13375E-07        | 3.84509E-07    | 2.85784E-07        | 2.94443E-07      | 3.98942E-07        |
|             |           | D             | 4.34737E-07        | 3.86818E-07    | 3.20424E-07        | 1.8244E-07       | 4.26077E-07        |
|             |           | E             | 4.40511E-07        | 3.00217E-07    | 3.30239E-07        | 0.548505E-07     | 1.18932E-07        |

---

## References

1. US EPA. 2011. Recommended Use of BW3/4 as the Default Method in Derivation of the Oral Reference Dose. EPA/100/R11/001. Office of the Science Advisor. Available online: <http://www.epa.gov/raf/publications/pdfs/recommended-use-of-bw34.pdf> (accessed on 01 October 2021).
2. US EPA. 2010. Risk-Based Concentration Table. United States Environmental Protection Agency. Available online: <http://www.epa.gov/reg3hwmd/risk/human/index.htm> (accessed on 01 October 2023).
3. Ferreira-Baptista, L.; De Miguel, E. Geochemistry and risk assessment of street dust in Luanda, Angola: a tropical urban environment. *Atmos. Environ.* **2005**, *39*, 4501-4512.
4. Ajeh, E.A.; Modi, F.J.; Omoregi, I.P. Health risk estimations and geospatial mapping of trace metals in soil samples around automobile mechanic workshops in Benin city, Nigeria. *Toxicol Rep.* **2022**, *9*, 575–587.
5. Adedokun, A.; Njoku, K.; Akinola, M.; Adesuyi, A.; Jolaoso, A. Potential human health risk assessment of heavy metals intake via consumption of some leafy vegetables obtained from four market in Lagos Metropolis, Nigeria. *J. Appl. Sci. Environ. Manage* **2016**, *20*, 530-39.
6. Hakanson, L. An ecological risk index for aquatic pollution control. A sedimentological approach. *Water Res.* **1980**, *14*, 975–1001.
7. Müller, G. Die Schwermetallbelastung der Sedimenten des Neckars und Seiner Nebenflüsse. *Chemiker-Zeitung*. **1981**, *6*, 157–164.
